# Supplementary material for: Nanoforest of hierarchical core/shell CuO@NiCo2O4nanowire heterostructure arrays on nickel foam for high-performance supercapacitors
Source: Royal Society of Chemistry journal article supplement (doi:10.1039/c6ra10033c), 2016-01-01
Supplement: c6ra10033c1.pdf [file c6ra10033c1.pdf]

## Nanoforest of hierarchical core/shell CuO@NiCo<sub>2</sub>O<sub>4</sub> nanowire heterostructure arrays on nickel foam for high-performance supercapacitors

Chun Wu, Junjie Cai, Ying Zhu, Kaili Zhang\*

Department of Mechanical and Biomedical Engineering, City University of Hong Kong, 83 Tat Chee Avenue, Hong Kong

\* Corresponding authors, E-mail address: kaizhang@cityu.edu.hk

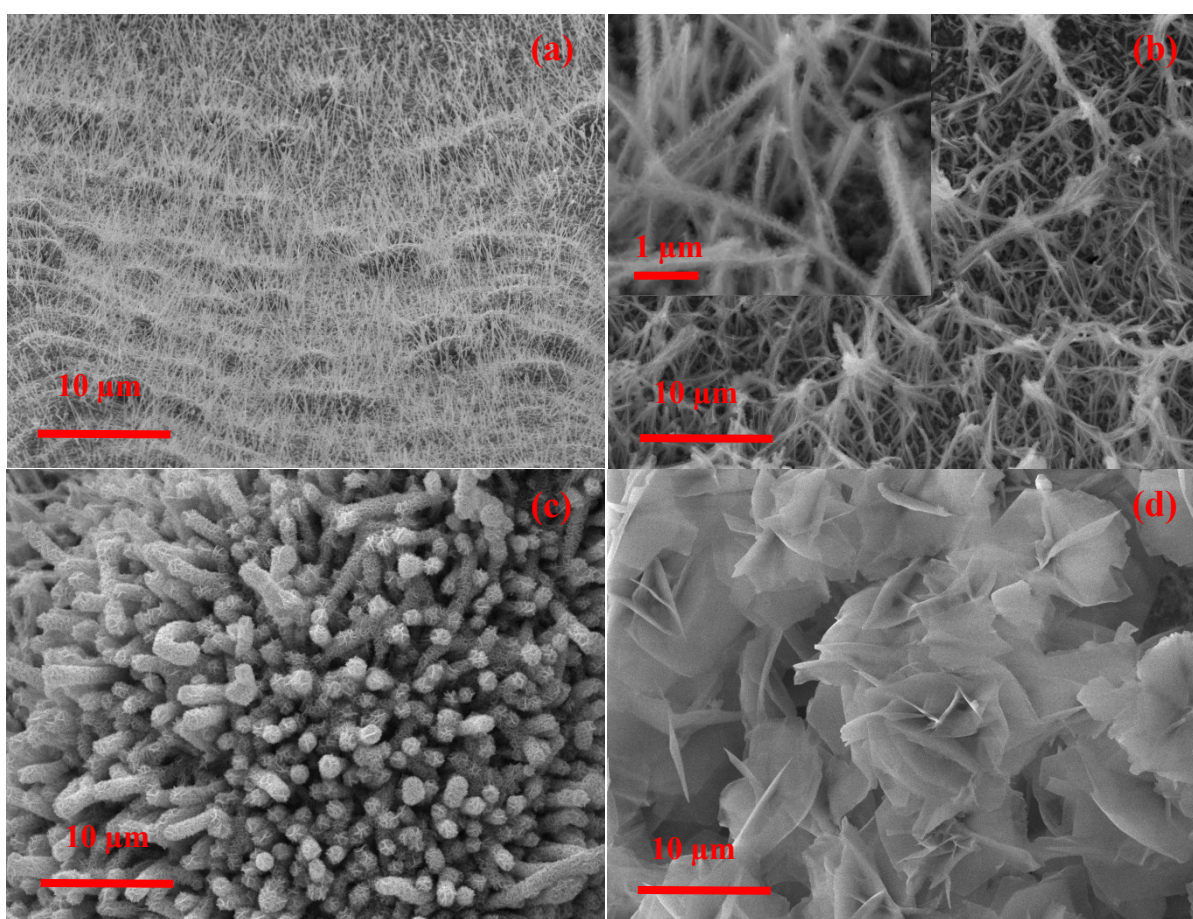

Figure S1 SEM images of (a) nickel foam supported CuO nanowires, (b-d) CuO@NiCo<sub>2</sub>O<sub>4</sub> electrode materials under different reaction time, 1h, 2h and 3h.

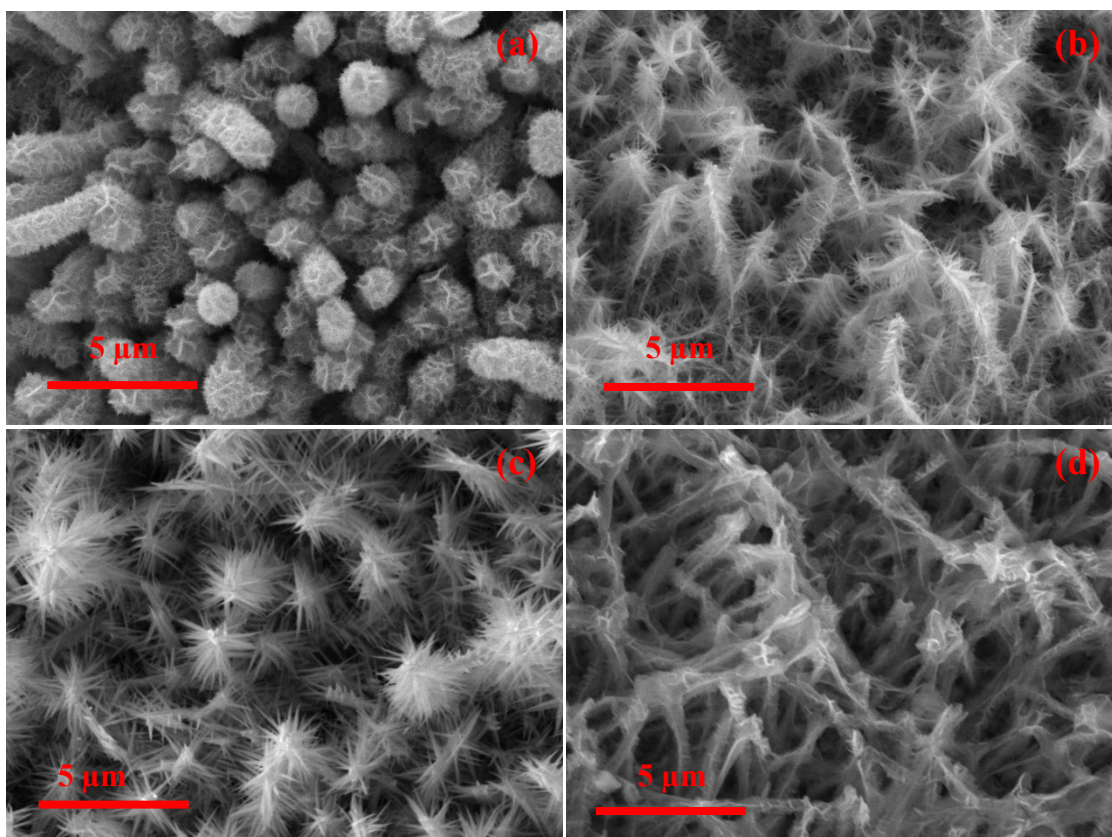

Figure S2 SEM images of CuO@NiCo<sub>2</sub>O<sub>4</sub> electrode materials prepared from different salts with the same ratios between Co and Ni at 130 °C for 5 h: (a) sulfates, (b) nitrates, (c) chlorates and (d) acetates.

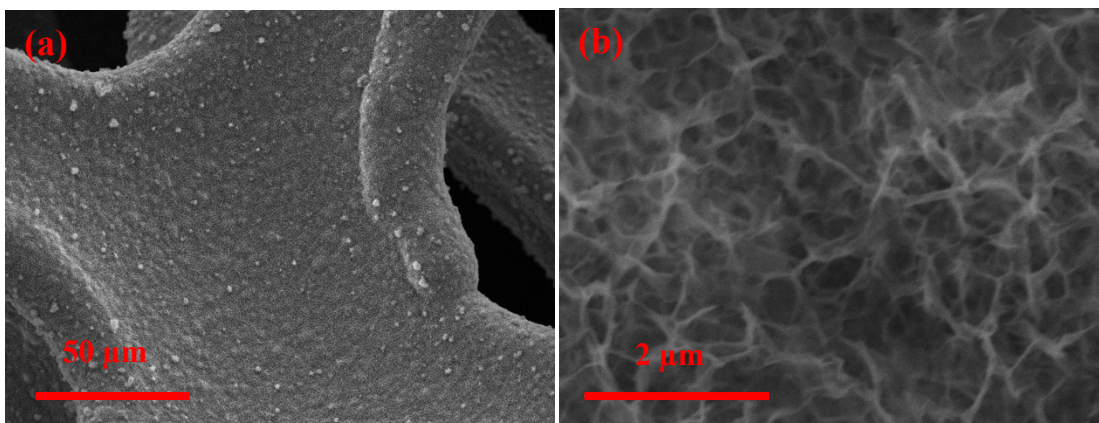

Figure S3 SEM images of nickel foam supported  $\text{NiCo}_2\text{O}_4$  electrode material

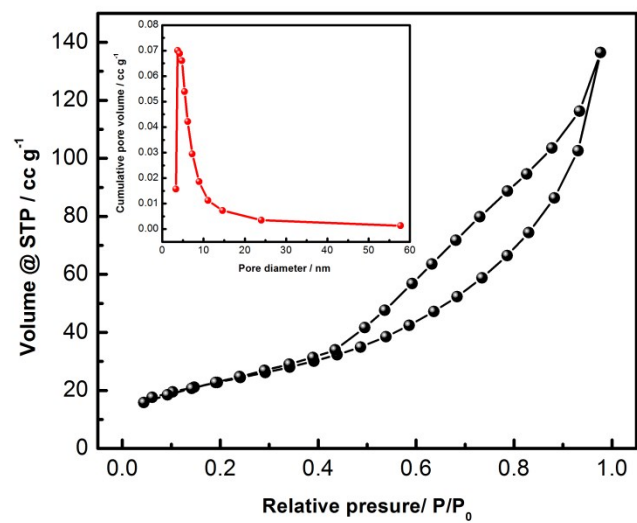

Figure S4 N<sub>2</sub> adsorption/desorption isotherm of the hierarchical mesoporous NiCo<sub>2</sub>O<sub>4</sub> nanosheet branches, the inset is the pore distribution

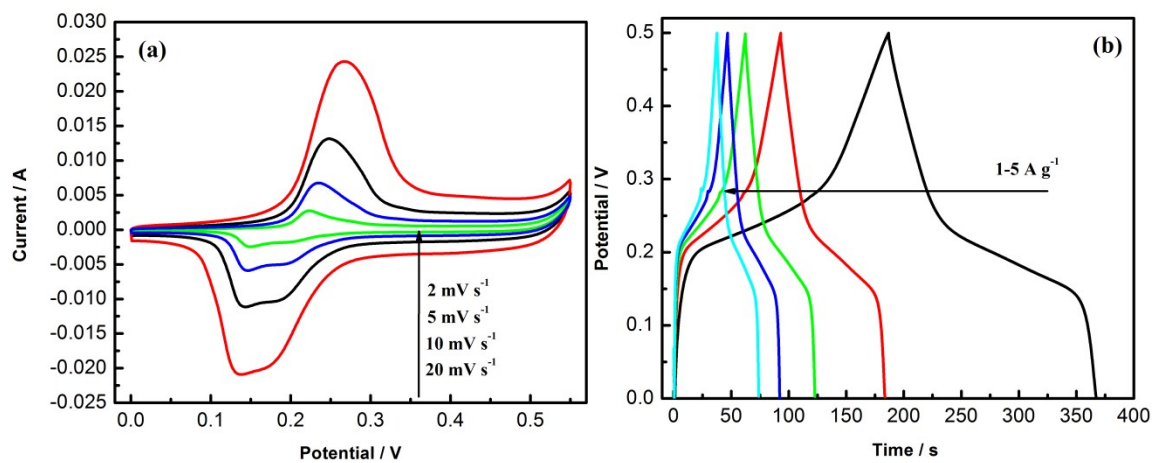

Figure S5 (a) CV and (b) charge/discharge curves of the NiCo<sub>2</sub>O<sub>4</sub> electrode

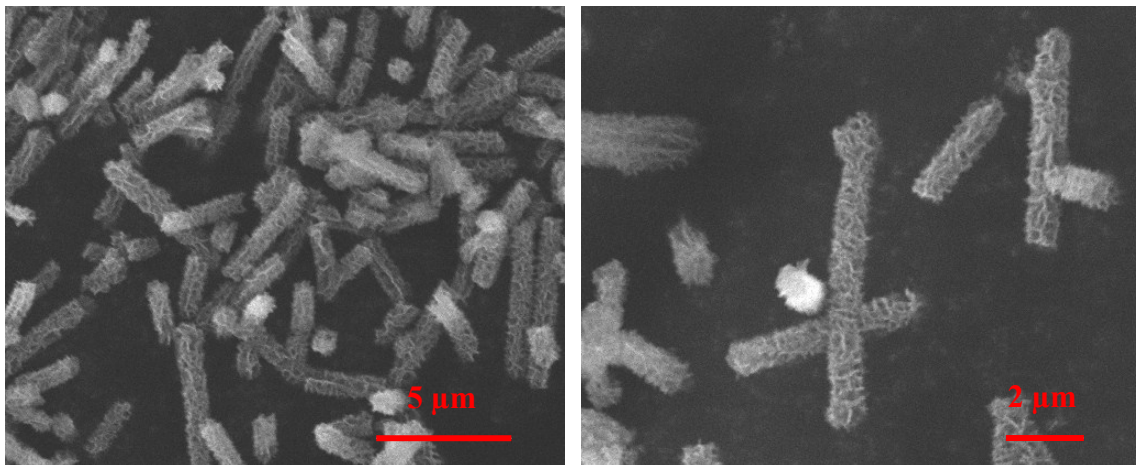

Figure S6 SEM images of CuO@NiCo<sub>2</sub>O<sub>4</sub>-1 electrode material

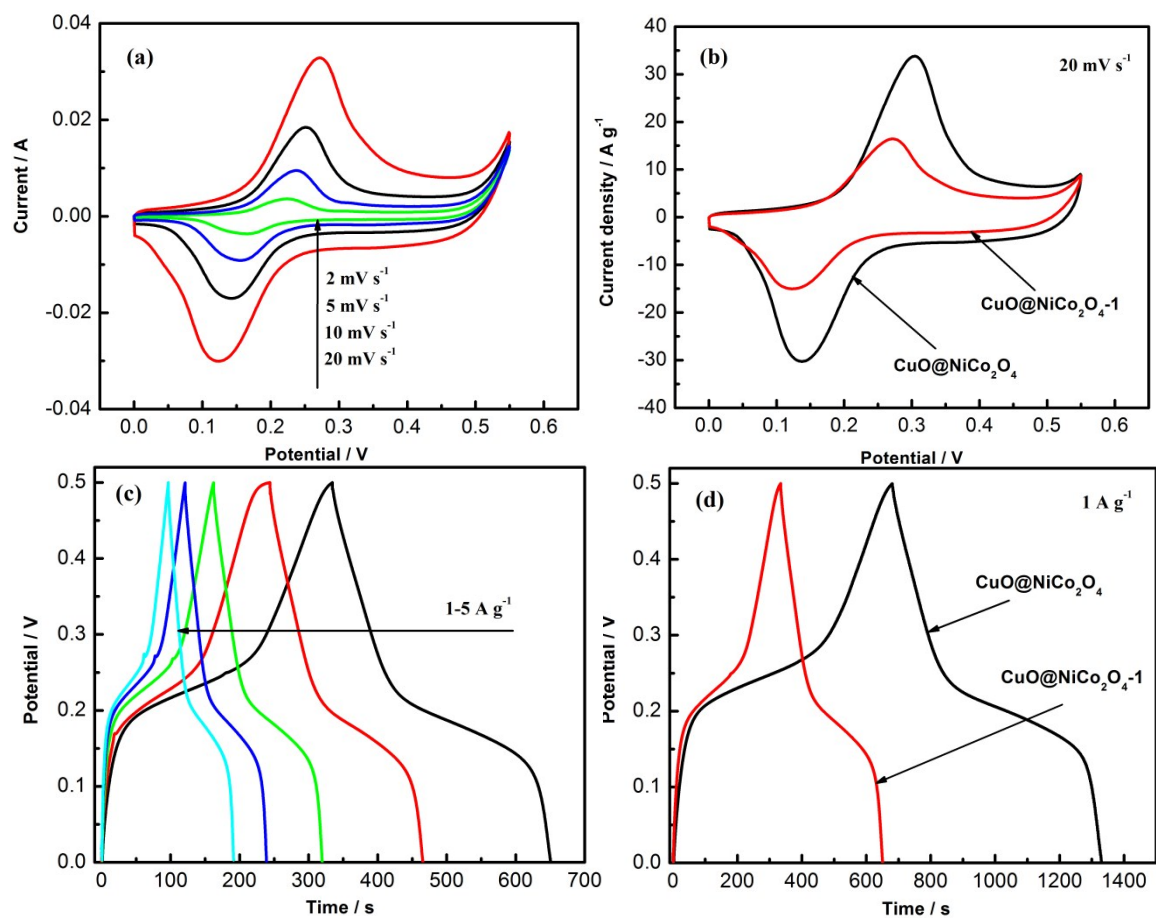

Figure S7 (a) and (c) CV and charge/discharge curves of the CuO@NiCo<sub>2</sub>O<sub>4</sub>-1 electrode, (b) and (d) Comparisons of CV and charge/discharge curves between CuO@NiCo<sub>2</sub>O<sub>4</sub> and CuO@NiCo<sub>2</sub>O<sub>4</sub>-1 electrode

Table S1 Specific capacitance of different NiCo<sub>2</sub>O<sub>4</sub> electrode and nickel foam supported core/shell CuO@NiCo<sub>2</sub>O<sub>4</sub> nanowire heterostructure arrays

| Electrode Materials                                                       | Specific Capacitance                            | Ref.      |
|---------------------------------------------------------------------------|-------------------------------------------------|-----------|
| Flower-shaped NiCo <sub>2</sub> O <sub>4</sub> microsphere                | 1006 F g <sup>-1</sup> at 1 A g <sup>-1</sup>   | 1         |
| Porous spinel NiCo <sub>2</sub> O <sub>4</sub>                            | 726.8 F g <sup>-1</sup> at 1 A g <sup>-1</sup>  | 2         |
| Porous NiCo <sub>2</sub> O <sub>4</sub> heterostructure arrays            | 891 F g <sup>-1</sup> at 1 A g <sup>-1</sup>    | 3         |
| Porous NiCo <sub>2</sub> O <sub>4</sub> nanowires                         | 743 F g <sup>-1</sup> at 1 A g <sup>-1</sup>    | 4         |
| Porous NiCo <sub>2</sub> O <sub>4</sub> flowerlike nanostructure          | 658 F g <sup>-1</sup> at 1 A g <sup>-1</sup>    | 5         |
| Urchin-like NiCo <sub>2</sub> O <sub>4</sub>                              | 636 F g <sup>-1</sup> at 0.5 A g <sup>-1</sup>  | 6         |
| Core/shell CuO@NiCo <sub>2</sub> O <sub>4</sub><br>heterostructure arrays | 1129.8 F g <sup>-1</sup> at 1 A g <sup>-1</sup> | This work |



## References

- 1 Y. Lei, J. Li, Y. Y. Wang, L. Gu, Y. F. Chang, H. Y. Yuan, and D. Xiao, *ACS Appl. Mater. Interfaces*, 2014, 6, 1773-1780.
- 2 Z. B. Wu, X. L. Pu, Y. R. Zhu, M. J. Jing, Q. Y. Chen, X. N. Jia, and X. B. Ji, *J. Alloys Compd.*, 2015, 632, 208-217.
- 3 X. Y. Liu, Y. Q. Zhang, X. H. Xia, S. J. Shi, Y. Lu, X. L. Wang, C. D. Gu, and J. P. Tu, *J. Power Sources*, 2013, 239, 157-163.
- 4 H. Jiang, J. Ma, and C. Z. Li, *Chem. Commun.*, 2012, 48, 4465-4467.
- 5 H. C. Chen, J. J. Jiang, L. Zhang, T. Qi, D. D. Xia and H. Z. Wan, *J. Power Sources*, 2014, 248, 28-36.
- 6 E. Umeshbabu, G. Rajeshkhanna, G. R. Rao, *Int. J. Hydrogen Energy*, 2014, 39, 15627-15638.
